# Supplementary material
Source: publisher site journal article supplement (https://www.dovepress.com/get_supplementary_file.php?f=341591.xlsx)
Supplement: Supplementary file 1 [file get_supplementary_file.php]

## Sheet: Sheet1
Table S1: This table shows the virulence factors of Janibacter YFY001 predicted by VFDB.
VFG0937	orf00131
VFG1583	orf00203
VFG0586	orf00226
VFG1387	orf00228
VFG1311	orf00248
VFG0035	orf00252
VFG1030	orf00294
VFG0922	orf00302
VFG1593	orf00421
VFG1406	orf00424
VFG0171	orf00479
VFG0344	orf00703
VFG0342	orf00705
VFG1392	orf00725
VFG2361	orf00815
VFG2569	orf00835
VFG1309	orf00841
VFG2226	orf00842
VFG0390	orf00889
VFG1269	orf00904
VFG0087	orf00949
VFG1411	orf01000
VFG0320	orf01016
VFG0921	orf01039
VFG1405	orf01210
VFG1824	orf01240
VFG2550	orf01269
VFG1098	orf01305
VFG1399	orf01332
VFG1398	orf01385
VFG2044	orf01401
VFG1826	orf01531
VFG1604	orf01563
VFG2546	orf01588
VFG0932	orf01595
VFG2552	orf01767
VFG2554	orf01768
VFG1953	orf01769
VFG2224	orf01773
VFG0479	orf01789
VFG1889	orf01839
VFG1983	orf01956
VFG1330	orf01984
VFG0478	orf01987
VFG0934	orf02024
VFG0919	orf02026
VFG1667	orf02061
VFG0924	orf02149
VFG0926	orf02150
VFG0928	orf02151
VFG0925	orf02152
VFG0077	orf02169
VFG1702	orf02313
VFG2362	orf02320
VFG0963	orf02345
VFG0430	orf02417
VFG1414	orf02495
VFG1855	orf02502
VFG1118	orf02595
VFG1384	orf02599
VFG0079	orf02620
VFG1668	orf02649
VFG1416	orf02654
VFG1417	orf02655
VFG0119	orf02711
VFG1035	orf02721
VFG1817	orf02804
VFG1421	orf02851
VFG1386	orf02867
VFG1965	orf02917
VFG2220	orf02960
VFG0082	orf02961
VFG1494	orf02986
VFG1379	orf02995
VFG0481	orf03027
VFG1404	orf03116
VFG0585	orf03159
VFG1553	orf03248
VFG1602	orf03264
VFG1631	orf03271
VFG2061	orf03381
VFG0121	orf03391
